# Supplementary material for: A comparison of clinical pathologic characteristics between alpha-fetoprotein negative and positive liver cancer patients from Eastern and Southern China
Source: Research Square preprint supplement (doi:10.21203/rs.3.rs-1030390/v1), 2021-11-08
Supplement: Supplementary file 1 [file 106308b8fbaa4073ad4cefab.docx]

**Supplementary Figure S1** **Distribution of AFP in patient groups**

**Supplementary Figure S1 Distribution of serum AFP in patient groups**

Supplementary Figure S1 shows that the distribution of AFP in all patient groups is in the lower level range (left side on the histogram), thus leading to a skewed normality test result.

**Supplementary Figure S2 Comparison of serum AFP levels among patient groups, clinical pathologic features**

**Supplementary Figure S2 Comparison of serum AFP levels among patient groups, clinical pathologic features**

Figure S2 further demonstrate the comparison results of serum AFP levels among patient groups, among different clinical pathologic features. A p value is marked for those parameters with significant difference.
